# Supplementary material for: Solution combustion synthesis, photoluminescence and X-ray luminescence of Eu-doped nanoceria CeO2:Eu
Source: Royal Society of Chemistry journal article supplement (doi:10.1039/c2jm34950g), 2012-01-01
Supplement: c2jm34950g.pdf [file c2jm34950g.pdf]

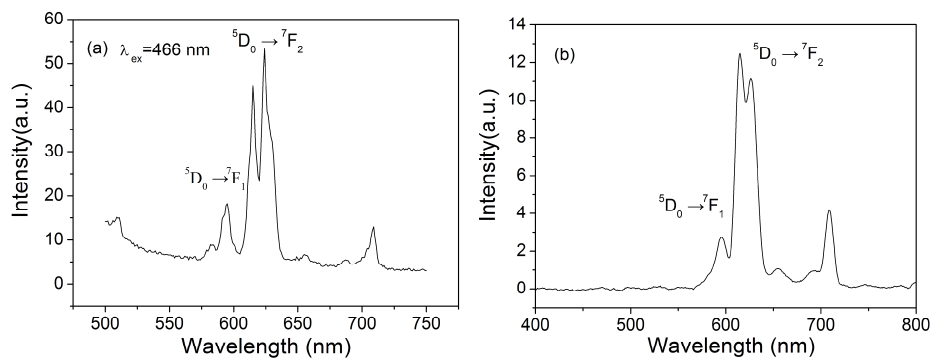

Fig. 1 Photoluminescence (a) and X-ray luminescence (b) of CeO<sub>2</sub>:Eu (x=8% mol) sample prepared by conventional solid state reaction.

The emission peaks ( ${}^5D_0 \rightarrow {}^7F_2$  transition) are at 615 and 626 nm, which is somewhat different from the luminescence achieved by SCS. Under the same Eu doping concentration (x=8% mol), the photoluminescence and X-ray luminescence intensity is much lower than that with SCS, as can be seen from Fig.5e and Fig.8a.
